# Supplementary material
Source: publisher figshare collection journal article supplement (https://acs.figshare.com/ndownloader/files/13194167)
Supplement: Supplementary file 1 [file 13194167]

## Supporting Information

### Multiple Intersystem Crossing Processes in Ge-doped Silica Glass: Emission Mechanism of Twofold Coordinated Ge atoms

Yu Nagayoshi, Ryosuke Matsuzaki and Takashi Uchino\*

*Department of Chemistry, Kobe University, Nada, Kobe 657-8501, Japan*

\*Corresponding author : uchino@kobe-u.ac.jp

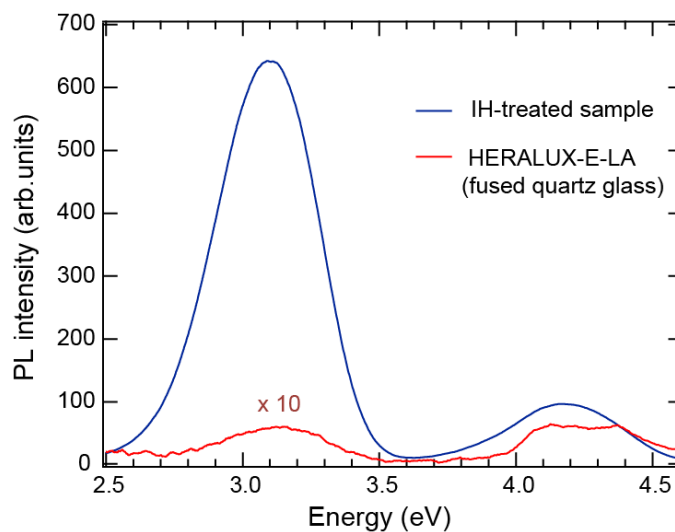

**Figure S1.** Room-temperature PL spectra of a Ge-doped silica sample prepared by IH method and a commercial fused quartz sample (HERALUX-E-LA) measured under  $S_0 \rightarrow S_1$  excitation at 5 eV.

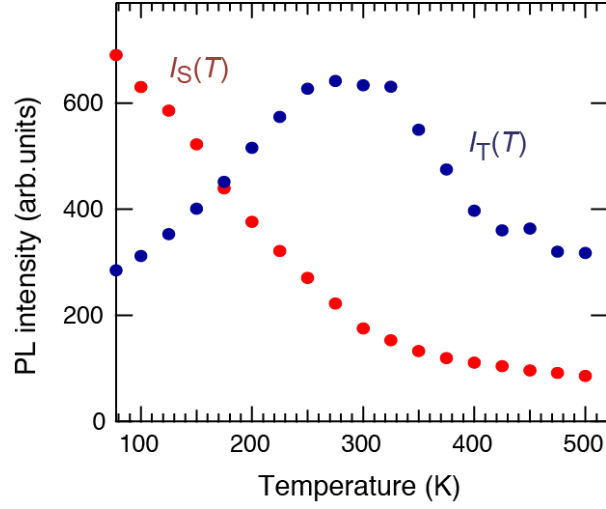

**Figure S2.** Temperature dependence of the PL signals of a commercial fused quartz sample measured under 5-eV excitation. PL intensities of the  $S_1 \rightarrow S_0$  ( $I_S(T)$ ) and the  $T_1 \rightarrow S_0$  ( $I_T(T)$ ) emission bands peaking at  $\sim 4.2$  and  $\sim 3.1$  eV, respectively, are shown as a function of temperature  $T$ .

#### Detailed derivation of Eqs. (5)-(8)

According to the emission scheme shown in Fig. 1(a), the kinetic equations for the respective energy levels can be written as follows:

$$\frac{dN_0}{dt} = -\alpha N_0 + k_S^R N_1 + (k_T^R + k_T^{NR}) N_2 \quad (S1)$$

$$\frac{dN_1}{dt} = \alpha N_0 - (k_S^R + k_{ISC}) N_1 \quad (S2)$$

$$\frac{dN_2}{dt} = k_{ISC} N_1 - (k_T^R + k_T^{NR}) N_2 \quad (S3)$$

where  $N_0$ ,  $N_1$ , and  $N_2$  are the population of the  $S_0$ ,  $S_1$  and  $T_n$  states, respectively,

When we treat the above equations under the steady state approximation  $dN_0/dt=dN_1/dt=dN_2/dt=0$ , the quantum efficiency  $\eta$  of the  $S_1 \rightarrow S_0$  ( $\eta_S$ ) and  $T_n \rightarrow S_0$  ( $\eta_T$ ) emission can be represented by

$$\eta_S = \frac{k_S^R N_1}{\alpha N_0} = \frac{k_S^R}{k_S^R + k_{ISC}} \quad (S4)$$

$$\eta_T = \frac{k_1 N_2}{\alpha N_0} = \frac{k_T^R k_{ISC}}{(k_T^R + k_T^{NR})(k_S^R + k_{ISC})} \quad (S5)$$

Under normal excitation conditions, the emission intensity is linearly correlated with  $\eta$ . Accordingly, the resulting emission intensity of the  $S_1 \rightarrow S_0$  ( $I_S$ ) and  $T_n \rightarrow S_0$  ( $I_T$ ) processes are

$$I_S = K_1 \frac{k_S^R}{k_S^R + k_{ISC}} \quad , \quad (S6) \text{ or } (5)$$

$$I_T = K_2 \frac{k_T^R k_{ISC}}{(k_T^R + k_T^{NR})(k_S^R + k_{ISC})} \quad (S7) \text{ or } (6)$$

where  $K_1$  and  $K_2$  are the scaling (temperature independent) constants depending on a given excitation intensity and the instrumental conditions. Using the functional form of  $k_{ISC}$  [see Eq. (4) in the text], Eq. (S6) can be modified into the following form:

$$\begin{aligned} I_S(T) &= K_1 \frac{k_S^R}{(k_S^R + k_{ISC}^{(1)} + A_{ISC}^{(2)} \exp(-E_{ISC}^{(2)}/k_B T) + A_{ISC}^{(3)} \exp(-E_{ISC}^{(3)}/k_B T))} \\ &= K_1 \frac{1}{(1 + (k_{ISC}^{(1)}/k_S^R) + (A_{ISC}^{(2)}/k_S^R) \exp(-E_{ISC}^{(2)}/k_B T) + (A_{ISC}^{(3)}/k_S^R) \exp(-E_{ISC}^{(3)}/k_B T))} \end{aligned}$$

$$= \frac{C_1}{1 + C_2 \exp\left(-\frac{E_{\text{ISC}}^{(2)}}{k_B T}\right) + C_3 \exp\left(-\frac{E_{\text{ISC}}^{(3)}}{k_B T}\right)}, \quad (\text{S8) or (7)}$$

where

$$C_1 = \frac{K_1 k_S^R}{k_S^R + k_{\text{ISC}}^{(1)}},$$

$$C_2 = \frac{A_{\text{ISC}}^{(2)}}{k_S^R + k_{\text{ISC}}^{(1)}},$$

$$C_3 = \frac{A_{\text{ISC}}^{(3)}}{k_S^R + k_{\text{ISC}}^{(1)}},$$

Similarly, Eq. (S7) can be modified into the following form using the functional form of  $k_T^{\text{NR}}$  [see Eq. (3) in the text] and  $k_{\text{ISC}}$  [see Eq. (4) in the text]:

$$I_T(T) = K_2 \frac{k_T^R(k_{\text{ISC}}^{(1)} + A_{\text{ISC}}^{(2)} \exp(-E_{\text{ISC}}^{(2)}/k_B T) + A_{\text{ISC}}^{(3)} \exp(-E_{\text{ISC}}^{(3)}/k_B T))}{\left(k_T^R + A_T^{\text{NR1}} \exp(-\frac{E_T^{\text{NR1}}}{k_B T}) + A_T^{\text{NR2}} \exp(-E_T^{\text{NR2}}/k_B T)\right) \left(k_S^R + k_{\text{ISC}}^{(1)} + A_{\text{ISC}}^{(2)} \exp(-E_{\text{ISC}}^{(2)}/k_B T) + A_{\text{ISC}}^{(3)} \exp(-E_{\text{ISC}}^{(3)}/k_B T)\right)}$$

$$= \frac{C_4(C_5 + C_2 \exp\left(-\frac{E_{\text{ISC}}^{(2)}}{k_B T}\right) + C_3 \exp\left(-\frac{E_{\text{ISC}}^{(3)}}{k_B T}\right))}{(1 + C_6 \exp\left(-\frac{E_T^{\text{NR1}}}{k_B T}\right) + C_7 \exp\left(-\frac{E_T^{\text{NR2}}}{k_B T}\right))(1 + C_2 \exp\left(-\frac{E_{\text{ISC}}^{(2)}}{k_B T}\right) + C_3 \exp\left(-\frac{E_{\text{ISC}}^{(3)}}{k_B T}\right))}, \quad (\text{S9) or (8)}$$

where

$$C_4 = K_2,$$

$$C_5 = \frac{k_{\text{ISC}}^{(1)}}{k_{\text{S}}^{\text{R}} + k_{\text{ISC}}^{(1)}},$$

$$C_6 = \frac{A_{\text{T}}^{\text{NR1}}}{k_{\text{T}}^{\text{R}}},$$

$$C_7 = \frac{A_{\text{T}}^{\text{NR2}}}{k_{\text{T}}^{\text{R}}}.$$

From the fits of the data shown in Fig. 2(a) to Eqs. (7) and (8), we can obtain the values of activation energies, i.e.,  $E_{\text{T}}^{\text{NR1}}$ ,  $E_{\text{T}}^{\text{NR2}}$ ,  $E_{\text{ISC}}^{(2)}$ ,  $E_{\text{ISC}}^{(3)}$ , along with the parameters related to the frequency factors, i.e.,  $C_i$  ( $i=1-7$ ). The fitted values are shown in Fig. 2(a). It should be noted, however, that the values of  $C_i$  ( $i=1-7$ ) do not represent the absolute values of the frequency factors but are the relative values among these frequency factors.
